# Supplementary material for: Vectorial attosecond transient spectroscopy
Source: Research Square preprint supplement (doi:10.21203/rs.3.rs-6656668/v1), 2025-06-05
Supplement: Supplementary file 1 [file 79176b04a3a28cc2daf45dba.pdf]

1        **Vectorial attosecond transient spectroscopy - Supplementary**  
2                                **Information**

3            Noa Yaffe,<sup>1,2</sup> Chen Mor,<sup>1</sup> Nirit Dudovich,<sup>1</sup> and Omer Kneller<sup>1,3</sup>

4                                <sup>1</sup>*Department of Physics of Complex Systems,*  
5                                *Weizmann Institute of Science, Rehovot, Israel*

6                                <sup>2</sup>*Email: noa.yaffe@weizmann.ac.il*

7                                <sup>3</sup>*Email: omer.kneller@weizmann.ac.il*

|    |                                                          |    |
|----|----------------------------------------------------------|----|
| 9  | 1. Experimental setup                                    | 2  |
| 10 | 2. Quantum path and polarization state isolation         | 4  |
| 11 | 2.1. Effective susceptibility tensor                     | 4  |
| 12 | 2.2. Channel separation                                  | 5  |
| 13 | 2.3. Spectral polarization states of the generated field | 6  |
| 14 | 3. Experimental data and analysis                        | 7  |
| 15 | 3.1. Complementary measurements                          | 7  |
| 16 | 3.2. Data analysis                                       | 10 |
| 17 | 4. Dynamical Stokes parameters                           | 11 |
| 18 | References                                               | 15 |

## 19 1. EXPERIMENTAL SETUP

20 The experimental setup is composed of a co-linear XUV–XUV interferometer with two  
 21 HHG sources and an interaction cell. A schematic description of the experimental setup is  
 22 shown in figure 1. A Ti:sapphire laser system with 1-kHz repetition rate delivers IR pulses  
 23 with 30fs duration at a central wavelength of 800nm. A co-propagating perpendicular  
 24 second harmonic field (SH) is generated via second-harmonic generation using a 100 $\mu$ m  
 25 type-I  $\beta$ -barium borate (BBO) crystal. Group-velocity dispersion is compensated using a  
 26 birefringent calcite crystal, temporally separating the IR and SH pulses. The sub-cycle  
 27 delay between the fundamental IR and the additional SH field is controlled using a pair of  
 28 glass wedges. The BBO, calcite and glass wedges are placed after the focusing lens to min-  
 29 imize chromatic aberrations. The IR+SH beam is focused into a continuous-flow gas cell  
 30 filled with noble-gas atoms (Kr) to generate an APT (XUV 1) composed of odd harmonics  
 31 only. Here, the SH does not influence the HHG process due to its low intensity and large  
 32 temporal separation. The XUV and IR+SH are spatially separated by a thin aluminum  
 33 filter (200nm thickness). All beams are refocused by a curved double-mirror (75cm focal  
 34 length). The IR+SH are then restored to temporal overlap by a drilled fused silica plate,  
 35 while fully transmitting XUV 1 through its central hole. All fields enter an interaction  
 36 cell, allowing non-linear XUV wave-mixing processes involving the IR+SH driving-field. A  
 37 piezo stage controls the temporal delay  $\Delta t$  between the inner and outer mirror segments

38 with attosecond resolution. A continuous-flow (Kr) glass nozzle downstream generates  
 39 a reference APT (XUV 2) from the overlapped IR+SH field, composed of odd and even  
 40 harmonics. The odd (even) harmonics are polarized along the IR (SH) field. The reference  
 41 pulses (XUV 2) interfere with the transmitted pulses (Transmitted XUV 1), modified by  
 42 the non-linear interaction. The XUV-XUV interference is spectrally resolved using a flat-  
 43 field aberration-corrected concave grating, recorded using a micro-channel plate (MCP)  
 44 detector and imaged by a charge-coupled device (CCD) camera.

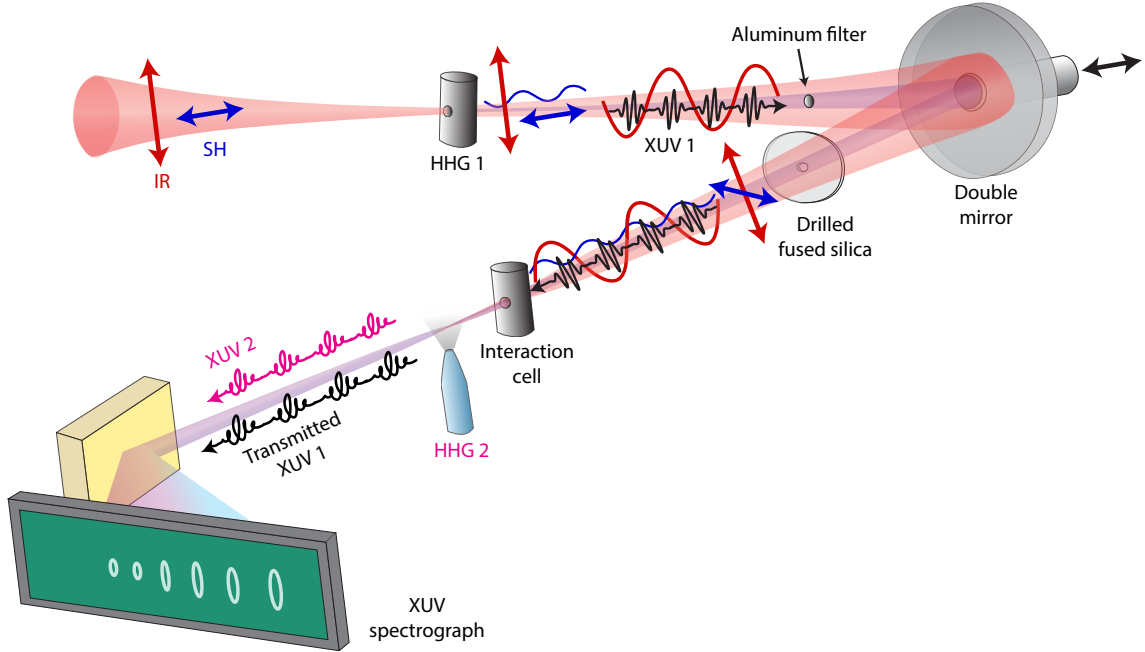

Figure 1. **Experimental setup for vectorial attosecond transient spectroscopy.** A strong IR field and its weak perpendicular second-harmonic (SH) are focused into the a gas cell, where the first attosecond pulse train (APT) is generated. The IR and SH are not temporally overlapped such that only linear odd harmonics (XUV 1) are produced in the first cell. An aluminum filter spatially separates XUV 1. A fused silica window is used to restore temporal overlap between the IR and SH. All fields are refocused into a helium filled interaction cell, inducing non-linear processes. The relative delay  $\Delta t$  between XUV 1 and the two-color field is controlled by a two-segment mirror. A third gas source generates the reference APT (XUV 2), composed of even and odd harmonics with linear and orthogonal polarization states, which interferes with the modified APT (Transmitted XUV 1).

## 2. QUANTUM PATH AND POLARIZATION STATE ISOLATION

### 2.1. Effective susceptibility tensor

Non-linear interactions modify the effective XUV complex optical susceptibility. In general, the properties of the target can be manipulated in a vectorial manner via the interaction with a vectorial incoming field  $\vec{E}_{in}$ . Such a field interacts with the electronic wavefunction of the target, generating non-linear wave-mixing processes. When the interaction is generated in an atomic gas targets, even orders of the susceptibility vanish, reflecting the isotropic nature of the system. Due to these symmetry constraints, the lowest non-linear order of the interaction is a four-wave-mixing mechanism. The generated field in a transient interaction can be approximated by:  $\vec{E}_{gen}(\omega) \approx \vec{E}_{gen}^{(1)}(\omega) + \vec{E}_{gen}^{(3)}(\omega)$ , where  $\vec{E}_{gen}^{(1)}$  and  $\vec{E}_{gen}^{(3)}$  are the linear and third-order response, respectively. The incoming field can have the form  $\vec{E}_{in} = \vec{E}_{dr}(\Delta t) + \vec{E}_{pr}$ , where  $\vec{E}_{dr}$  is the vectorial driving-field, in the VIS-IR regime, and  $\vec{E}_{pr}$  is the probing attosecond pulses in the XUV spectral regime. Controlling the delay between the two fields,  $\Delta t$ , allows the attosecond pulses to probe the transient interaction. The generated field is proportional to the structural susceptibility tensor of the target<sup>1</sup>,  $\overleftrightarrow{\chi}$ , and the interaction follows:

$$\begin{aligned} \vec{E}_{gen}(\omega, \Delta t) &\approx \vec{E}_{gen}^{(1)}(\omega) + \vec{E}_{gen}^{(3)}(\omega, \Delta t) \\ &= i\omega\xi\chi^{(1)}(\omega)\vec{E}_{pr}(\omega) \\ &\quad + i\omega\xi \iiint_{\Gamma} d\omega_1 d\omega_2 d\Omega \chi^{(3)}(\omega; \omega_1, \omega_2, \Omega) \vec{E}_{dr}(\omega_1) e^{-i\omega_1 \Delta t} \vec{E}_{dr}(\omega_2) e^{-i\omega_2 \Delta t} \vec{E}_{pr}(\Omega) \\ \Gamma : \omega &= \omega_1 + \omega_2 + \Omega \end{aligned} \tag{1}$$

with  $\xi$  being a proportionality constant, representing the density length product of the interaction cell. The linear and third-order susceptibility terms,  $\chi^{(1)}$  and  $\chi^{(3)}$ , set the optical response up to four-wave-mixing processes. From this equation, we can define an effective susceptibility tensor for the interaction

$$\overleftrightarrow{\chi}^{eff}(\omega, \Omega) \equiv i\omega\xi \int d\omega_1 \chi^{(3)}(\omega; \omega_1, \omega_2, \Omega) \vec{E}_{dr}(\omega_1) \vec{E}_{dr}(\omega_2), \quad \omega_2 = \omega - \omega_1 - \Omega \tag{2}$$

and simplify the expression of the generated field:

$$\vec{E}_{gen}(\omega, \Delta t) \approx i\omega\xi\chi^{(1)}(\omega)\vec{E}_{pr}(\omega) + \int d\Omega \overleftrightarrow{\chi}^{eff}(\omega, \Omega) \vec{E}_{pr}(\Omega) e^{i(\Omega-\omega)\Delta t} \tag{3}$$

The effective susceptibility  $\overleftrightarrow{\chi}^{eff}(\omega, \Omega)$  converts an incoming XUV frequency  $\Omega$  to an outgoing XUV frequency  $\omega$ , and its tensoric form allows it to rotate polarization. The term  $\overleftrightarrow{\chi}^{eff}(\omega, \Omega) e^{i(\Omega-\omega)\Delta t}$  beats with the frequency difference between the incoming and

69 generated fields, leading to sub-cycle modulations. We can further simplify the equations  
 70 by accounting for integer harmonic orders, setting

$$\omega = n\omega_{IR}, \quad \Omega = m\omega_{IR}, \quad n, m \in \mathbb{N} \quad (4)$$

71 and replacing integration over XUV frequencies by a sum:

$$\vec{E}_{gen}(n, \Delta t) \approx i\omega\xi\chi^{(1)}(n)\vec{E}_{pr}(n) + \sum_{m \in m_{odd}} \overleftrightarrow{\chi}^{eff}(n, m)\vec{E}_{pr}(m)e^{i(m-n)\Delta t} \quad (5)$$

72 The generated field encapsulates the light-driven quantum mechanical processes that  
 73 are induced in the target. Under the dipole approximation, the spectrum of the macro-  
 74 scopic generated field is proportional to the expectation value of the dipole response<sup>2</sup>:

$$\vec{E}_{gen}(\omega, \Delta t) \propto \vec{D}(\omega, \Delta t), \quad \vec{D}(t, \Delta t) = \langle \psi(t, \Delta t) | \vec{d} | \psi(t, \Delta t) \rangle \quad (6)$$

75 where  $\vec{d}$  is the dipole operator and  $\psi(t, \Delta t)$  is the electronic quantum wave-function of the  
 76 sample. Thus, the generated field captures the symmetries of the light-driven electronic  
 77 wavefunction.

## 78 2.2. Channel separation

79 Applying an interferometric approach, the generated XUV field is interfered with an  
 80 external reference, to determine its amplitude and phase. Then, the intensity of the signal  
 81 as function of optical frequency  $\omega$  and delay  $\Delta t$  is of the form:

$$I(\omega, \Delta t) \approx \left| \vec{E}_{pr}(\omega) + \vec{E}_{gen}^{(1)}(\omega) + \vec{E}_{gen}^{(3)}(\omega, \Delta t) + \vec{E}_{ref}(\omega, \Delta t) \right|^2 \quad (7)$$

82 capturing the interference term of the generated field with an external reference  $\vec{E}_{ref}(\omega, \Delta t) =$   
 83  $\vec{E}_{ref}(\omega)e^{-i\omega\Delta t}$ . Since  $\vec{E}_{pr}$  and  $\vec{E}_{gen}^{(1)}$  are not delay dependent, their interference signal with  
 84  $\vec{E}_{ref}(\omega)e^{-i\omega\Delta t}$  oscillates according to the optical frequency  $\omega$  and can be separated from  
 85 the non-linear contribution by Fourier analysis. We focus on the interference term be-  
 86 tween the non-linear field  $\vec{E}_{gen}^{(3)}$  and the reference. Following equation 3, we can define the  
 87 non-linear interference term:

$$I_{int}^{NL}(\omega, \Delta t) \equiv \left| \vec{E}_{gen}^{(3)}(\omega, \Delta t) + \vec{E}_{ref}(\omega, \Delta t) \right|^2 \quad (8)$$

$$= \left| \int d\Omega \overleftrightarrow{\chi}^{eff}(\omega, \Omega) \vec{E}_{pr}(\Omega) e^{i(\Omega-\omega)\Delta t} + \vec{E}_{ref}(\omega) e^{-i\omega\Delta t} \right|^2 \quad (9)$$

$$= \left| \int d\Omega \overleftrightarrow{\chi}^{eff}(\omega, \Omega) \vec{E}_{pr}(\Omega) e^{i\Omega\Delta t} + \vec{E}_{ref}(\omega) \right|^2 \quad (10)$$

$$= C(\omega) + (\vec{E}_{ref}(\omega))^* \cdot \int d\Omega \overleftrightarrow{\chi}^{eff}(\omega, \Omega) \vec{E}_{pr}(\Omega) e^{i\Omega\Delta t} + c.c. \quad (11)$$

88 with  $C(\omega) = |\vec{E}_{gen}^{(3)}|^2 + |\vec{E}_{ref}|^2$  being a spectral amplitude which does not depend on  $\Delta t$ .  
 89 This term separates the different non-linear channels, linking an incoming frequency to a  
 90 transmitted frequency, by taking a Fourier transform with respect to  $\Delta t$ :

$$A_{int}^{NL}(\omega, \nu) \propto (\vec{E}_{ref}(\omega))^* \cdot \int d\Omega \overleftrightarrow{\chi}^{eff}(\omega, \Omega) \vec{E}_{pr}(\Omega) \delta(\Omega - \nu) + c.c. \quad (12)$$

$$= (\vec{E}_{ref}(\omega))^* \cdot \overleftrightarrow{\chi}^{eff}(\omega, \nu) \vec{E}_{pr}(\nu) + c.c. \quad (13)$$

91 Equation 13 implies that the Fourier map  $I_{int}(\omega, \nu)$  is proportional to the effective sus-  
 92 ceptibility tensor  $\overleftrightarrow{\chi}^{eff}(\omega, \nu)$ , mapping incoming harmonic with optical frequency  $\nu$  to a  
 93 transmitted harmonic with optical frequency  $\omega$ .

94 Once again, the expressions can be simplified by considering integer harmonic numbers  
 95 (see Equation 4). Then, the non-linear interference is

$$I_{int}^{NL}(n, \Delta t) = \left| \sum_{m \in m_{odd}} \overleftrightarrow{\chi}^{eff}(n, m) \vec{E}_{pr}(m) e^{im\omega_{IR}\Delta t} + \vec{E}_{ref}(n) \right|^2 \quad (14)$$

96 and the complex Fourier map has the form:

$$A_{int}^{NL}(n, m) \propto (\vec{E}_{ref}(n))^* \cdot \overleftrightarrow{\chi}^{eff}(n, m) \vec{E}_{pr}(m) + c.c., \quad m \in m_{odd} \quad (15)$$

### 97 2.3. Spectral polarization states of the generated field

98 For a general driving-field  $\vec{E}_{dr}$ , the  $\hat{a}$  polarization component of the non-linear generated  
 99 field  $\vec{E}_{gen}^{(3)}$  is

$$\begin{aligned} E_{gen,a}^{(3)}(\omega, \Delta t) &= i\omega\xi \sum_{bcd} \iiint_{\Gamma} d\omega_1 d\omega_2 d\Omega \chi_{abcd}^{(3)}(\omega; \Omega, \omega_1, \omega_2) \\ &\quad \times E_{dr,b}(\omega_1) E_{dr,c}(\omega_2) E_{in,XUV,d}(\Omega) e^{i(\Omega-\omega)\Delta t} \\ &\quad \Gamma : \omega = \omega_1 + \omega_2 + \Omega \end{aligned} \quad (16)$$

100 where the tensor  $\chi_{abcd}^{(3)}$  converts three photons which are  $\hat{b}$ -,  $\hat{c}$ - and  $\hat{d}$ -polarized into one  
 101 photon with  $\hat{a}$ -polarization state.

102 In our experiment, the incoming IR and XUV are  $\hat{x}$ -polarized, and the incoming SH  
 103 has the perpendicular  $\hat{y}$ -polarization. In addition, the incoming XUV is composed of  
 104 odd harmonics only. Working in the  $\hat{x}, \hat{y}$  basis, every polarization index in  $\chi_{abcd}^{(3)}$  has to  
 105 appear twice to comply with the original symmetry of the bare atomic system, since a  
 106 homogeneous system is symmetric under  $\hat{x} \rightarrow -\hat{x}$  and  $\hat{y} \rightarrow -\hat{y}$ <sup>1</sup>. Therefore, the generated

field of the odd harmonics is:

$$E_{odd,\hat{x}}^{(3)}(\omega, \Delta t) = i\omega\xi \iint d\Omega d\omega_{IR} \chi_{xxxx}^{(3)}(\omega; \Omega, \omega_{IR}, \omega - \Omega - \omega_{IR}) \quad (17)$$

$$\begin{aligned} & \times E_{IR,\hat{x}}(\omega_{IR}) E_{IR,\hat{x}}(\omega - \Omega - \omega_{IR}) E_{in,odd,\hat{x}}(\Omega) e^{i(\Omega-\omega)\Delta t} \\ & = i\omega\xi \int d\Omega \chi_{x\leftarrow x}^{eff}(\omega, \Omega) \vec{E}_{in,odd}(\Omega) e^{i(\Omega-\omega)\Delta t} \end{aligned} \quad (18)$$

$$\chi_{x\leftarrow x}^{eff}(\omega, \Omega) = \int d\omega_{IR} \chi_{xxxx}^{(3)}(\omega; \Omega, \omega_{IR}, \omega - \Omega - \omega_{IR}) E_{IR,\hat{x}}(\omega_{IR}) E_{IR,\hat{x}}(\omega - \Omega - \omega_{IR})$$

where we omit processes of the form  $\chi_{xyyx}$  which involve more than one SH photon due to the relatively low intensity of the SH field. The contribution of the even harmonics is:

$$E_{even,\hat{y}}^{(3)}(\omega, \Delta t) = i\omega\xi \iint d\Omega d\omega_{SH} \chi_t^{(3)}(\omega; \Omega, \omega_{SH}, \omega - \Omega - \omega_{SH}) \quad (19)$$

$$\begin{aligned} & \times E_{SH\hat{y}}(\omega_{SH}) E_{IR,\hat{x}}(\omega - \Omega - \omega_{SH}) E_{odd,in,\hat{x}}(\Omega) e^{i(\Omega-\omega)\Delta t} \\ & = i\omega\xi \int d\Omega \chi_{y\leftarrow x}^{eff}(\omega, \Omega) \vec{E}_{in,odd}(\Omega) e^{i(\Omega-\omega)\Delta t} \end{aligned} \quad (20)$$

$$\chi_{y\leftarrow x}^{eff}(\omega, \Omega) = \int d\omega_{SH} \chi_t^{(3)}(\omega; \Omega, \omega_{SH}, \omega - \Omega - \omega_{SH}) E_{SH\hat{y}}(\omega_{SH}) E_{IR,\hat{x}}(\omega - \Omega - \omega_{SH})$$

with  $\chi_t^{(3)} = \chi_{xyyx}^{(3)} + \chi_{yyxx}^{(3)}$  converting  $\hat{x}$ -polarized odd harmonics into  $\hat{y}$ -polarized even harmonics. To conclude, the original symmetry of the atomic system and the symmetry of the incoming fields define the symmetry of the field-driven system, setting the polarization state of the transmitted harmonics: odd harmonics are  $\hat{x}$ -polarized, and even harmonics are  $\hat{y}$ -polarized, as illustrated in Figure 2.

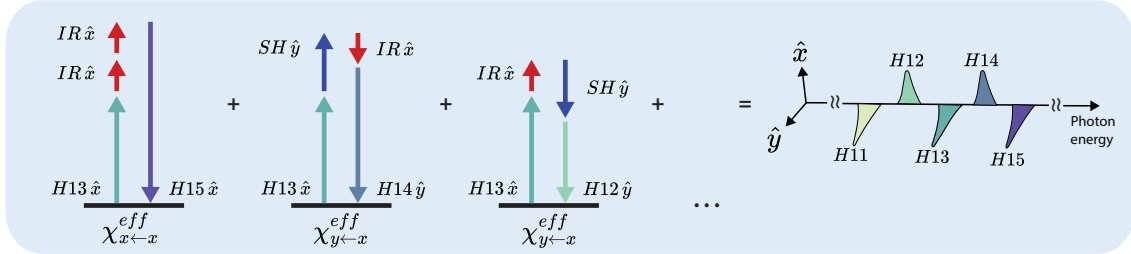

Figure 2. **Vectorial four-wave-mixing processes in the frequency domain.**  $\hat{x}$ -polarized odd harmonics interact with a symmetric target driven by  $IR\hat{x}+SH\hat{y}$  field. Selection rules set two types of possible processes:  $\chi_{x\leftarrow x}^{eff}$  which generates odd harmonics, or  $\chi_{y\leftarrow x}^{eff}$  which generates even harmonics.

### 3. EXPERIMENTAL DATA AND ANALYSIS

#### 3.1. Complementary measurements

In order to explore the origin of each Fourier peak in the Fourier analysis of vectorial attosecond transient spectroscopy, two additional experiments were conducted: vectorial

119 attosecond transient absorption (TA) and an interferometric measurement, performed  
120 under identical experimental conditions. The results are presented in Figure 3.

121 TA is performed by removing the XUV reference source, probing the amplitude modula-  
122 tions of the transmitted attosecond pulses<sup>3-5</sup>. A train of linearly polarized odd harmonics  
123 interact with the helium target driven by the orthogonally polarized two-color field, resolv-  
124 ing the spectrum as function of the delay between the incoming XUV and the driving-field,  
125  $\Delta t$ . In such experiment, the appearance of even harmonics would indicate transient non-  
126 linear polarization rotation. However, the generated even harmonics are weak, and cannot  
127 be properly detected. TA captures the appearance of harmonic 14, but does not detect  
128 harmonic 12, which has a weaker amplitude. The Fourier analysis of these results are  
129 shown in 3a. The odd harmonics present  $2\omega_{IR}$  oscillations, which are a hallmark of at-  
130 tosecond transient absorption<sup>4,6,7</sup>. The Fourier analysis of the TA measurement contains  
131 low Fourier frequency components only for harmonic 14, probing its dynamical properties  
132 along a relatively slow time scale, dictated by the envelope of the pulse.

133 The interferometric experiment is performed by switching off the intermediate helium  
134 gas target. This experiment interferes the attosecond pulses of both HHG sources<sup>8-11</sup>. The  
135 first HHG source produces a train of linearly polarized attosecond pulses, composed of odd  
136 harmonics only. The second HHG source produces vectorial attosecond pulses, even and  
137 odd harmonics with linear and perpendicular polarization states. The Fourier analysis of  
138 the interferometric experiment is presented in Figure 3b. The Fourier map shows that the  
139 odd harmonics oscillate according to their photon frequency and the even harmonics do  
140 not have any XUV Fourier peaks. All harmonics present  $1\omega_{IR}$  oscillations with respect to  
141 the delay. These oscillations appear due to a minor IR leak through the aluminum filter.  
142 Scanning the delay causes a residual IR-IR interference in the second HHG source, which  
143 slightly perturbs the harmonic yield. This experimental artifact is fully separated by a  
144 Fourier analysis.

145 In the third step we combine the two measurements and resolve vectorial attosecond  
146 transient spectroscopy. Figure 3c shows the map of this Fourier analysis. On the lower part  
147 of the Fourier spectrum, vectorial attosecond transient spectroscopy captures the  $2\omega_{IR}$  os-  
148 cillations of attosecond transient absorption, along with the  $1\omega_{IR}$  experimental artifact  
149 of the interferometric experiment. The higher XUV part of the spectrum presents the  
150 interferometric peaks of the odd harmonics, accompanied by  $2\omega_{IR}$  sidebands, which indi-  
151 cate amplitude and phase modulations to the harmonics, applied by the four-wave-mixing  
152 processes. For the even harmonics, simple Fourier analysis with no spectral averaging cap-



153 tures  $13\omega_{IR}$  oscillations, indicating that harmonic 13 contributed to the generation of both  
 154 harmonic 12 and harmonic 14. Vectorial attosecond transient spectroscopy can identify  
 155 the incoming harmonics that were involved in transient non-linear polarization rotation,  
 156 probing the sub-cycle dynamics of this ultrafast mechanism. In addition, this experiment  
 157 allows the detection of weak signal, which is inaccessible without a lock-in detection.

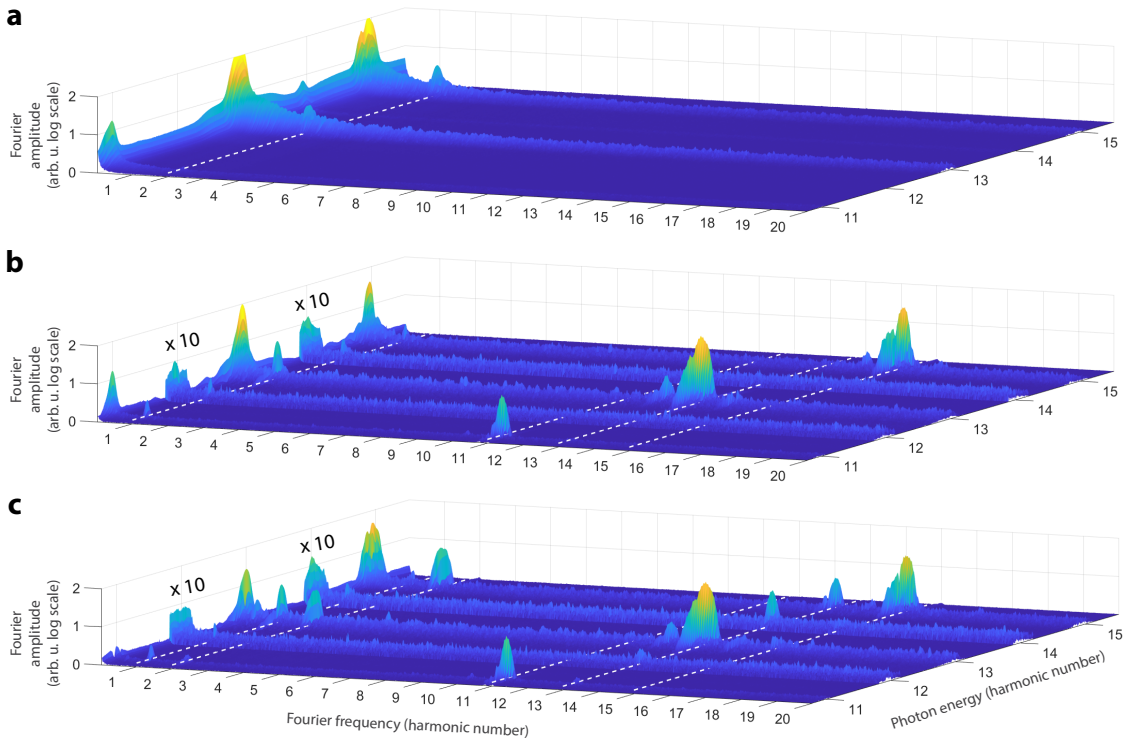

Figure 3. **Experimental results of transient absorption (TA), interferometry and vectorial attosecond transient spectroscopy.** The results are presented with spatial averaging only. **(a)** Fourier analysis of TA. Harmonic 13 and harmonic 15 show  $2\omega_{IR}$  absorption oscillations. Harmonic 12 does not appear, and harmonic 14 shows only DC response. **(b)** Fourier analysis of an interferometric experiment, switching off the gas in the helium target. The even harmonic signal is  $\times 10$  magnified. Strong interferometric oscillations are shown for the odd harmonics, some accompanied by  $1\omega_{IR}$  sidebands, which follow the modulations of the reference. The even harmonics do not have signal in the XUV Fourier frequency regime. **(c)** Fourier analysis of vectorial attosecond transient spectroscopy. The even harmonic signal is  $\times 10$  magnified. All features of both TA and the interferometric experiment appear. Odd harmonics present  $2\omega_{IR}$  sidebands, for example sideband 15 in harmonic 13 and sideband 13 in harmonic 15. Both even harmonics present  $13\omega_{IR}$  oscillations, with no spectral averaging.

### 3.2. Data analysis

In order to enhance the visibility of the oscillations (see Figure 2 in the main text), an additional Fourier analysis with respect to the delay was applied. Performing Fourier transform of the experimental data with respect to  $\Delta t$  isolates the relevant Fourier frequencies for each transmitted photon energy. We normalize each optical frequency by its DC Fourier component and apply a Fourier filter around the  $2\omega_{IR}$  peaks, the positive interferometric components and their  $2\omega_{IR}$  sidebands. The Fourier filter has a spectral range of  $\pm 0.155\text{eV}$ - $0.465\text{eV}$  ( $\pm 0.1$ - $0.3$  harmonic number) around the relevant frequency components to fully include all the selected Fourier peaks. Then, we perform inverse Fourier transform with respect to  $\Delta t$ , using the analytic signal analysis method<sup>12,13</sup>. This filtering increases the signal-to-noise ratio and avoids experimental artifacts.

Next, we apply both spatial and spectral averaging to the harmonics, presenting their one-dimensional Fourier components in Figure 3 in the main text. This analysis further increases the signal-to-noise ratio, allowing to capture additional Fourier peaks of harmonic 14 ( $11\omega_{IR}$  and  $15\omega_{IR}$ ). In this analysis, we chose for each harmonic a spatial and spectral region with sufficient Fourier amplitude and a flat phase for as many Fourier components as possible. The results are shown in Figure 4. Harmonics 11 and 13 present clear interferometric envelopes, accompanied by weaker beating pattern. Harmonic 12 presents a much weaker signal, oscillating with  $13\omega_{IR}$  periodicity, recording the coherent contribution of harmonic 13 in the formation of harmonic 12. These oscillations are a signature of ultra-fast non-linear polarization rotation, as the incoming harmonic 13 has  $\hat{x}$ -polarization, and the transmitted harmonic 12 has  $\hat{y}$ -polarization. Harmonic 15 and harmonic 14 are both presented in the two-dimensional spectrograms in the main text (Figure 2). The one-dimensional representation of these harmonics highlights two important aspects. First, both harmonics present beating pattern, a signature of the interference between multiple quantum paths, separated in the main text in Figure 3. The second aspect is the absorption of harmonic 15 and emission of harmonic 14 that appear outside of the interferometric envelope, around  $\Delta t = 40\text{fs}$ . These dynamics are associated with the helium 1s3p resonance ( $\sim 23.1\text{eV}$ )<sup>14</sup>, that lies within the bandwidth of harmonic 15. Harmonic 15 contributes to the transmission of harmonic 14, correlating the absorption feature in harmonic 15 to the emission of harmonic 14 via perturbed free induction decay<sup>15–17</sup>.

In attosecond transient interferometry, the waveform of each transmitted harmonic is encoded in the interference term between the generated field and the reference, which includes the interferometric peaks and their sidebands in Fourier domain<sup>18</sup>. To illustrate

the waveform, only these Fourier peaks were isolated with a filter ( $\pm 0.155\text{eV}$  around each Fourier component). Then, we perform an additional inverse Fourier transform at a fixed  $\Delta t$ , projecting the measured harmonics into the time domain. We illustrate the temporal evolution of the transmitted APT by assigning linear and orthogonal polarization states to odd and even harmonics. The reconstruction is presented in Figure 3a in the main text.

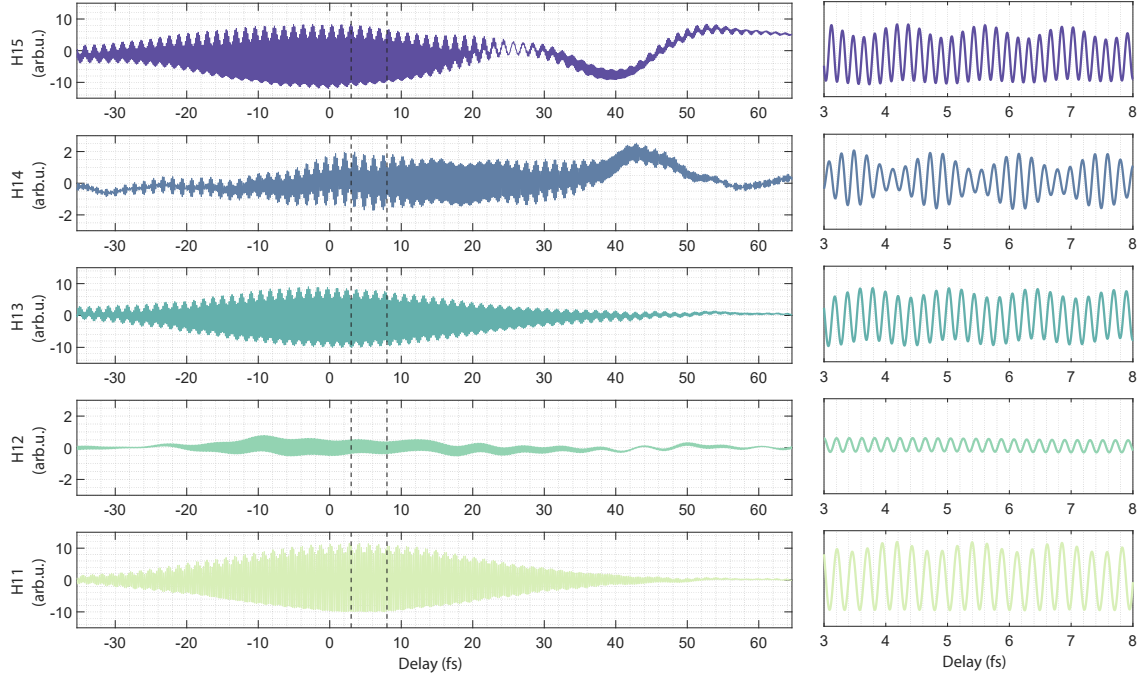

Figure 4. **Vectorial attosecond transient spectroscopy interference signal.** The results are DC normalized and presented with both spatial and spectral averaging. The oscillations of the odd harmonics are modified by the non-linear interaction, reflected by a beating pattern. Even harmonics present oscillations that capture generated field components which rotate the polarization of the incoming APT. Harmonic 15 and harmonic 14 show absorption and emission around  $\Delta t = 40\text{fs}$ , which can be associated with perturbed free induction decay.

#### 4. DYNAMICAL STOKES PARAMETERS

The Stokes parameters provide a complete representation of the polarization state of light. These parameters are a set of four values, including intensity ( $S_0$ ), the degree of linear polarization ( $S_1$  and  $S_2$ ), and circular polarization ( $S_3$ ). The Stokes parameters are widely used to describe and analyze polarization states<sup>19</sup>.

The monochromatic Stokes parameters for a complex field  $\vec{E}(t) = \vec{E}(\omega)e^{-i\omega t}$  can be

203 defined as:

$$\begin{aligned}
S_0 &= |E_x|^2 + |E_y|^2 = |E_a|^2 + |E_b|^2 = |E_l|^2 + |E_r|^2 \\
S_1 &= |E_x|^2 - |E_y|^2 \\
S_2 &= |E_a|^2 - |E_b|^2 \\
S_3 &= |E_r|^2 - |E_l|^2
\end{aligned} \tag{21}$$

204 with the basis vectors

$$\hat{a} = \frac{1}{\sqrt{2}} (\hat{x} + \hat{y}), \hat{b} = \frac{1}{\sqrt{2}} (\hat{x} - \hat{y}); \quad \hat{l} = \frac{1}{\sqrt{2}} (\hat{x} + i\hat{y}), \hat{r} = \frac{1}{\sqrt{2}} (\hat{x} - i\hat{y}) \tag{22}$$

205 expressed in the  $\{\hat{x}, \hat{y}\}$  basis.  $S_0$  is the intensity of the field, and therefore can be calculated  
206 by the summation over the squared value of any orthonormal basis. The other Stokes  
207 parameters account for the intensity difference between different orthogonal polarization  
208 components.  $S_1$  shows the difference between the  $\hat{x}$ -component and the  $\hat{y}$ -component.  
209  $S_2$  represents the tilt orientation of the field, and  $S_3$  reveals the handedness, comparing  
210 between right- and left-circular polarization intensity components ( $\hat{r}$  and  $\hat{l}$ , respectively).  
211 Representing the Stokes parameters in the  $\{\hat{x}, \hat{y}\}$  basis, the expressions become:

$$\begin{aligned}
S_0 &= |E_x|^2 + |E_y|^2, \quad S_1 = |E_x|^2 - |E_y|^2 \\
S_2 &= 2\text{Re}[E_x E_y^*], \quad S_3 = -2\text{Im}[E_x E_y^*]
\end{aligned} \tag{23}$$

212 where the asterisk denotes complex conjugation.

213 To describe the vectorial properties of a complex multi-color field  $\vec{E}(t) = \int_0^\infty \vec{E}(\omega) e^{-i\omega t} d\omega$ ,  
214 we need to consider its second-order correlations. In our experiment, such an analysis  
215 is necessary since the coherent superposition of the bilinear harmonics sets the temporal  
216 polarization state of the transmitted attosecond pulses. In the spectral domain, the po-  
217 larization properties are fully described by the cross-spectral density matrix (CSDM)<sup>20</sup>.  
218 The two-frequency CSDM for coherent fields is:

$$W_{ij}(\omega_1, \omega_2) = E_i^*(\omega_1) E_j^T(\omega_2) \tag{24}$$

219 where  $i, j \in \{\hat{x}, \hat{y}\}$  denote the linear polarization components and  $W$  is Hermitian,  
220  $W^*(\omega_2, \omega_1) = W(\omega_1, \omega_2)$ . Then, the spectral two-frequency Stokes parameters are

$$\begin{aligned}
S_0(\omega_1, \omega_2) &= W_{xx}(\omega_1, \omega_2) + W_{yy}(\omega_1, \omega_2) = E_x^*(\omega_1) E_x(\omega_2) + E_y^*(\omega_1) E_y(\omega_2) \\
S_1(\omega_1, \omega_2) &= W_{xx}(\omega_1, \omega_2) - W_{yy}(\omega_1, \omega_2) = E_x^*(\omega_1) E_x(\omega_2) - E_y^*(\omega_1) E_y(\omega_2) \\
S_2(\omega_1, \omega_2) &= W_{xy}(\omega_1, \omega_2) + W_{yx}(\omega_1, \omega_2) = E_x^*(\omega_1) E_y(\omega_2) + E_y^*(\omega_1) E_x(\omega_2) \\
S_3(\omega_1, \omega_2) &= i(W_{yx}(\omega_1, \omega_2) - W_{xy}(\omega_1, \omega_2)) = i(E_y^*(\omega_1) E_x(\omega_2) - E_x^*(\omega_1) E_y(\omega_2))
\end{aligned} \tag{25}$$

221 and their relation to the time domain is:

$$S_j(t) = \int \int S_j(\omega_1, \omega_2) e^{i(\omega_1 - \omega_2)t} d\omega_1 d\omega_2 \quad (26)$$

222 Each polarization axis  $j$  satisfies  $E_j(t) = \int_0^\infty E_j(\omega) e^{-i\omega t} d\omega$ , and we can describe the  
 223 polarization of the transmitted attosecond pulses by integrating over  $\omega_1, \omega_2$  separately.  
 224 For example, the ellipticity parameter  $S_3(t)$  can be expressed as

$$\begin{aligned} S_3(t) &= \int \int S_3(\omega_1, \omega_2) e^{i(\omega_1 - \omega_2)t} d\omega_1 d\omega_2 \\ &= \int \int i(E_y^*(\omega_1)E_x(\omega_2) - E_x^*(\omega_1)E_y(\omega_2)) e^{i(\omega_1 - \omega_2)t} d\omega_1 d\omega_2 \\ &= \int \int i(E_y^*(\omega_1)e^{i\omega_1 t}E_x(\omega_2)e^{-i\omega_2 t} - E_x^*(\omega_1)e^{i\omega_1 t}E_y(\omega_2)e^{-i\omega_2 t}) d\omega_1 d\omega_2 \\ &= i(E_y^*(t)E_x(t) - E_x^*(t)E_y(t)) \\ &= -2\text{Im}[E_x(t)E_y^*(t)] \end{aligned} \quad (27)$$

225 and similar expressions can be obtained for the other time-depended Stokes parameters:

$$\begin{aligned} S_0 &= |E_x(t)|^2 + |E_y(t)|^2, \quad S_1 = |E_x(t)|^2 - |E_y(t)|^2 \\ S_2 &= 2\text{Re}[E_x(t)E_y(t)^*], \quad S_3 = -2\text{Im}[E_x(t)E_y(t)^*] \end{aligned} \quad (28)$$

226 The reconstruction of the experimental Stokes parameters is obtained by performing  
 227 an inverse Fourier transform to the experimental results along the photon frequency  $\omega$ , at  
 228 a given delay time  $\Delta t$ , assuming a flat spectral phase for the reference field. Thus, we can  
 229 use equation 28 to present the dynamical polarization state, accounting for the temporal  
 230 evolution of different optical frequencies. The reconstructed dynamical Stokes parameters  
 231 are shown in Figure 3b in the main text. The complex field of the transmitted harmonics  
 232 below helium ionization threshold follows:

$$\begin{aligned} E_x &= A_{11}(t)e^{i11\omega_{IR}t + i\phi_{11}(t)} + A_{13}(t)e^{i13\omega_{IR}t + i\phi_{13}(t)} + A_{15}(t)e^{i15\omega_{IR}t + i\phi_{15}(t)} \\ E_y &= A_{12}(t)e^{i12\omega_{IR}t + i\phi_{12}(t)} + A_{14}(t)e^{i14\omega_{IR}t + i\phi_{14}(t)} \end{aligned} \quad (29)$$

233 where  $\omega_{IR}$  is the central frequency of the IR field, and with amplitude and phase functions  
 234  $A_j(t), \phi_j(t)$  that evolve on a multi-cycle timescale, determined by the temporal envelope  
 235 of the fundamental field. In this case, the dynamics of the Stokes parameters will be  
 236 dominated by:

$$\begin{aligned} S_0, S_1 &\propto e^{i2\omega_{IR}t}, e^{i4\omega_{IR}t} \\ S_2, S_3 &\propto e^{i\omega_{IR}t}, e^{i3\omega_{IR}t} \end{aligned} \quad (30)$$

237 The expressions for the total intensity ( $S_0$ ) and the difference between  $\hat{x}$  and  $\hat{y}$  intensities  
 238 ( $S_1$ ) do not couple  $E_x$  and  $E_y$  and thus oscillate at even orders of  $\omega_{IR}$ . The orientation ( $S_2$ )  
 239 and handedness ( $S_3$ ) capture the interplay between  $E_x$  and  $E_y$ , which changes substantially  
 240 by their relative phase. Therefore, these dynamical Stokes parameters oscillate at odd  
 241 orders of  $\omega_{IR}$ . The temporal evolution of the polarization state, captured by the dynamical  
 242 Stokes parameters, reflects the dynamical symmetries of the field-driven system which  
 243 evolves on a sub-cycle timescale.

- 
- 244 <sup>1</sup> Robert W. Boyd. *Nonlinear Optics, 4th Edition*. Academic Press, March 2020.
- 245 <sup>2</sup> JC Baggesen, Eva Lindroth, and LB Madsen. Theory of attosecond absorption spectroscopy in  
246 krypton. *Physical Review A*, 85(1):013415, 2012.
- 247 <sup>3</sup> M Holler, F Schapper, L Gallmann, and Ursula Keller. Attosecond electron wave-packet inter-  
248 ference observed by transient absorption. *Physical review letters*, 106(12):123601, 2011.
- 249 <sup>4</sup> Shaohao Chen, M Justine Bell, Annelise R Beck, Hiroki Mashiko, Mengxi Wu, Adrian N Pfeiffer,  
250 Mette B Gaarde, Daniel M Neumark, Stephen R Leone, and Kenneth J Schafer. Light-induced  
251 states in attosecond transient absorption spectra of laser-dressed helium. *Physical Review A*,  
252 86(6):063408, 2012.
- 253 <sup>5</sup> Michael Chini, Baozhen Zhao, He Wang, Yan Cheng, SX Hu, and Zenghu Chang. Subcycle  
254 ac stark shift of helium excited states probed with isolated attosecond pulses. *Physical review*  
255 *letters*, 109(7):073601, 2012.
- 256 <sup>6</sup> Mengxi Wu, Shaohao Chen, Seth Camp, Kenneth J. Schafer, and Mette B. Gaarde. Theory  
257 of strong-field attosecond transient absorption. *Journal of Physics B: Atomic, Molecular and*  
258 *Optical Physics*, 49(6):062003, February 2016.
- 259 <sup>7</sup> Jørgen Johansen Rørstad, Jens E. Bækhoj, and Lars Bojer Madsen. Analytic modeling of  
260 structures in attosecond transient-absorption spectra. *Physical Review A*, 96(1):013430, July  
261 2017.
- 262 <sup>8</sup> Doron Azoury, Omer Kneller, Shaked Rozen, Barry D Bruner, Alex Clergerie, Yann Mairesse,  
263 Baptiste Fabre, Bernard Pons, Nirit Dudovich, and Michael Krüger. Electronic wavefunctions  
264 probed by all-optical attosecond interferometry. *Nature Photonics*, 13(1):54, 2019.
- 265 <sup>9</sup> Doron Azoury, Omer Kneller, Michael Krüger, Barry D Bruner, Oren Cohen, Yann Mairesse,  
266 and Nirit Dudovich. Interferometric attosecond lock-in measurement of extreme-ultraviolet  
267 circular dichroism. *Nature Photonics*, 13(3):198, 2019.
- 268 <sup>10</sup> Omer Kneller, Doron Azoury, Yotam Federman, Michael Krüger, Ayelet J Uzan, Gal Orenstein,  
269 Barry D Bruner, Olga Smirnova, Serguei Patchkovskii, Misha Ivanov, et al. A look under the  
270 tunnelling barrier via attosecond-gated interferometry. *Nature photonics*, 16(4):304–310, 2022.
- 271 <sup>11</sup> Michael Krüger and Nirit Dudovich. Attosecond Interferometry. In Kiyoshi Ueda, editor,  
272 *Ultrafast Electronic and Structural Dynamics*, pages 45–71. Springer Nature, Singapore, 2024.
- 273 <sup>12</sup> A. Reilly, G. Frazer, and B. Boashash. Analytic signal generation-tips and traps. *IEEE Trans-*  
274 *actions on Signal Processing*, 42(11):3241–3245, 1994.
- 275 <sup>13</sup> Maans Klingspor. Hilbert transform: Mathematical theory and applications to signal process-  
276 ing, 2015.
- 277 <sup>14</sup> J.R.Fuhr W.L.Wieseand. Accurate atomic transition probabilities for hydrogen, helium, and  
278 lithium. *NIST database*, January 2009.
- 279 <sup>15</sup> Alexander Blättermann, Christian Ott, Andreas Kaldun, Thomas Ding, and Thomas Pfeifer.  
280 Two-dimensional spectral interpretation of time-dependent absorption near laser-coupled res-

- onances. *Journal of Physics B: Atomic, Molecular and Optical Physics*, 47(12):124008, June 2014.
- <sup>16</sup> Christian Ott, Andreas Kaldun, Luca Argenti, Philipp Raith, Kristina Meyer, Martin Laux, Yizhu Zhang, Alexander Blättermann, Steffen Hagstotz, Thomas Ding, Robert Heck, Javier Madroño, Fernando Martín, and Thomas Pfeifer. Reconstruction and control of a time-dependent two-electron wave packet. *Nature*, 516(7531):374–378, December 2014.
- <sup>17</sup> S. Beaulieu, E. Bloch, L. Barreau, A. Comby, D. Descamps, R. Géneaux, F. Légaré, S. Petit, and Y. Mairesse. Phase-resolved two-dimensional spectroscopy of electronic wave packets by laser-induced XUV free induction decay. *Physical Review A*, 95(4):041401, April 2017.
- <sup>18</sup> Omer Kneller, Chen Mor, Nikolai D. Klimkin, Noa Yaffe, Michael Krüger, Doron Azoury, Ayelet J. Uzan-Narovlansky, Yotam Federman, Debobrata Rajak, Barry D. Bruner, Olga Smirnova, Serguei Patchkovskii, Yann Mairesse, Misha Ivanov, and Nirit Dudovich. Attosecond transient interferometry. *Nature Photonics*, pages 1–8, November 2024. Publisher: Nature Publishing Group.
- <sup>19</sup> Eugene Hecht. *Optics, 5th Edition*. Pearson, 2017.
- <sup>20</sup> Jari Turunen and Frank Wyrowski. Time-dependent physical stokes parameters and degree of polarization of light. *Phys. Rev. A*, 99:023824, Feb 2019.
